# Supplementary material
Source: Springer Nature journal article supplement (https://www.springermedizin.de/resource/supplementary/12939_2009_171_MOESM5_ESM.pdf/9551642)

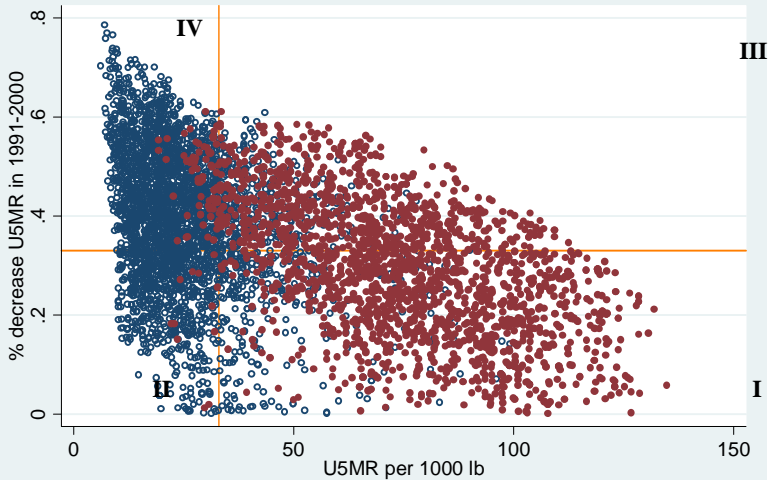

○ Rich municipalities    ● Poor municipalities

Supplement: MOESM5 [file 9551642]
